# Supplementary material
Source: PubMed Central journal article supplement (PMC4603282)
Supplement: NIHMS714623-supplement-1.pdf [file NIHMS714623-supplement-1.pdf]

**Supplementary Table S1. Incidence of mortality and loss to follow-up using a) Kaplan-Meier and b) competing risks estimation.**

| Duration on ART | Mortality     |                  | Loss to follow-up |                  |
|-----------------|---------------|------------------|-------------------|------------------|
|                 | a             | b                | a                 | b                |
| 12 months       | 4.1 (4.0-4.2) | 6.9 (6.7-7.1)    | 12.0 (11.8-12.2)  | 12.2 (12.0-12.5) |
| 24 months       | 5.4 (5.2-5.6) | 9.2 (8.9-9.4)    | 17.6 (17.4-17.9)  | 18.9 (18.3-18.9) |
| 36 months       | 6.3 (6.1-6.5) | 10.8 (10.6-11.1) | 22.5 (22.2-22.8)  | 24.3 (23.9-24.6) |

**Supplementary Table S2. Patient enrolment, median age and number (%) of patients ≥50 years at ART initiation, by calendar year of enrolment.**

|                                                 | Calendar year of enrolment |         |         |         |         |          |          |           |          | OVERALL  |
|-------------------------------------------------|----------------------------|---------|---------|---------|---------|----------|----------|-----------|----------|----------|
|                                                 | 2004                       | 2005    | 2006    | 2007    | 2008    | 2009     | 2010     | 2011      | 2012 /13 |          |
| Patients enrolled, n                            | 4 999                      | 6 793   | 8 521   | 8 696   | 10 129  | 11 201   | 12 088   | 11 482    | 9 657    | 83 566   |
| Median age (years)                              | 34                         | 34      | 35      | 35      | 35      | 35       | 35       | 35        | 35       | 35       |
| At ART initiation, patients ≥50 years old, n(%) | 290 (6)                    | 407 (6) | 635 (8) | 685 (8) | 907 (9) | 1055 (9) | 1119 (9) | 1236 (11) | 961 (10) | 7295 (9) |

**Supplementary Table S3. Exploring heterogeneity between cohorts: median age, number (percentage) of patients ≥50 years old at ART initiation and analysis closure, and estimates of the crude effect of age on mortality, by cohort.**

|                                     | Cohort                                                                       |                           |                               |                        |                               |                           |                  | TOTAL<br>(n=83 566) |
|-------------------------------------|------------------------------------------------------------------------------|---------------------------|-------------------------------|------------------------|-------------------------------|---------------------------|------------------|---------------------|
|                                     | Gugulethu<br>(n=5918, 7%)                                                    | Hlabisa<br>(n=19946, 24%) | Khayelitsha<br>(n=23713, 28%) | McCord<br>(n=6490, 8%) | Thembalethu<br>(n=23328, 28%) | Tygerberg<br>(n=4171, 5%) |                  |                     |
| Age, median (yrs)                   | 34 (29-40)                                                                   | 35 (29-42)                | 34 (29-40)                    | 35 (30-42)             | 36 (31-43)                    | 34 (29-41)                | 35 (29-42)       |                     |
| Patients ≥50 years old, n(%)        |                                                                              |                           |                               |                        |                               |                           |                  |                     |
| At ART initiation                   | 407 (7)                                                                      | 2 167 (11)                | 1473 (6)                      | 608 (9)                | 2 294 (10)                    | 346 (8)                   | 7 295 (9)        |                     |
| Initiating ART at CD4 <50 cells/μL* | 55 (14)                                                                      | 205 (9)                   | 179 (12)                      | 150 (25)               | 465 (20)                      | 49 (14)                   | 1 103 (15)       |                     |
| At analysis closure                 | 138 (13)                                                                     | 2 253 (16)                | 1 479 (10)                    | 389 (14)               | 1 850 (16)                    | 195 (15)                  | 6 304 (14)       |                     |
| Age categories (yrs)                | <b>Crude Hazard Ratios (HR) for the effect of age on mortality by cohort</b> |                           |                               |                        |                               |                           |                  |                     |
| 16-29                               | 1                                                                            | 1                         | 1                             | 1                      | 1                             | 1                         |                  |                     |
| 30-34                               | 0.99 (0.76-1.31)                                                             | 1.16 (1.03-1.32)          | 1.08 (0.95-1.22)              | 0.84 (0.63-1.12)       | 1.13 (0.99-1.28)              | 1.15 (0.83-1.58)          | 1.06 (0.99-1.14) |                     |
| 35-39                               | 1.22 (0.92-1.62)                                                             | 1.22 (1.07-1.38)          | 1.07 (0.93-1.22)              | 0.99 (0.74-1.31)       | 1.28 (1.12-1.45)              | 1.34 (0.97-1.85)          | 1.16 (1.08-1.24) |                     |
| 40-44                               | 1.69 (1.26-2.28)                                                             | 1.14 (0.99-1.31)          | 1.30 (1.12-1.50)              | 1.01 (0.73-1.40)       | 1.38 (1.20-1.58)              | 1.90 (1.37-2.64)          | 1.29 (1.20-1.40) |                     |
| 45-49                               | 2.09 (1.52-2.89)                                                             | 1.35 (1.16-1.57)          | 1.33 (1.11-1.60)              | 1.13 (0.78-1.64)       | 1.42 (1.22-1.65)              | 1.40 (0.94-2.09)          | 1.45 (1.33-1.58) |                     |
| 50-54                               | 2.97 (1.11-2.67)                                                             | 1.41 (1.18-1.68)          | 1.55 (1.24-1.94)              | 1.61 (1.07-2.40)       | 1.75 (1.47-2.08)              | 2.72 (1.82-4.05)          | 1.73 (1.57-1.92) |                     |
| 55-59                               | 2.97 (1.83-4.84)                                                             | 1.29 (1.01-1.65)          | 2.65 (2.04-3.44)              | 1.03 (0.55-1.92)       | 2.08 (1.67-2.58)              | 1.62 (0.82-3.23)          | 1.94 (1.70-2.20) |                     |
| 60-64                               | 5.53 (2.90-10.57)                                                            | 2.20 (1.64-2.95)          | 2.91 (1.90-4.46)              | 1.12 (0.49-2.56)       | 2.45 (1.79-3.36)              | 3.19 (1.39-7.32)          | 2.63 (2.19-3.16) |                     |
| 65+                                 | 2.36 (0.75-7.44)                                                             | 2.00 (1.45-2.74)          | 4.51 (2.78-7.32)              | 1.40 (0.44-4.42)       | 3.85 (2.55-5.81)              | 3.54 (1.43-8.78)          | 3.00 (2.43-3.70) |                     |

\*As a percentage of patients ≥50 years at ART initiation

**Supplementary Table S4. Hazard ratios of the interaction between the effects of baseline CD4 + cell count and age on mortality.**

| Age (years) | Median baseline CD4+ cell count (cells/ $\mu$ L) |                  |                  |
|-------------|--------------------------------------------------|------------------|------------------|
|             | <50                                              | 50-199           | $\geq$ 200       |
| 16-39       | 1                                                | 1                | 1                |
| 40-49       | 1.49 (1.24-1.80)                                 | 1.25 (1.15-1.36) | 1.14 (1.03-1.27) |
| $\geq$ 50   | 2.52 (2.04-3.11)                                 | 1.79 (1.62-1.98) | 1.54 (1.33-1.78) |

**Supplementary Table S5.  
Crude and adjusted estimates of the hazard of loss to follow-up.**

|                                             | <b>Crude HR</b>  | <b>Adjusted HR<br/>(n=83,576)</b> |
|---------------------------------------------|------------------|-----------------------------------|
| Age groups (years)                          |                  |                                   |
| 16-29                                       | 1                | 1                                 |
| 30-34                                       | 0.87 (0.84-0.90) | 0.80 (0.77-0.83)                  |
| 35-39                                       | 0.87 (0.84-0.90) | 0.78 (0.75-0.82)                  |
| 40-44                                       | 0.84 (0.80-0.87) | 0.76 (0.72-0.80)                  |
| 45-49                                       | 0.81 (0.76-0.85) | 0.73 (0.69-0.77)                  |
| 50-54                                       | 0.80 (0.74-0.85) | 0.71 (0.69-0.77)                  |
| 55-59                                       | 0.93 (0.85-1.01) | 0.82 (0.74-0.91)                  |
| 60-64                                       | 1.17 (1.02-1.33) | 0.98 (0.85-1.14)                  |
| 65+                                         | 0.93 (0.76-1.13) | 0.90 (0.73-1.11)                  |
| Male gender                                 | 1.25 (1.21-1.28) | 1.33 (1.29-1.37)                  |
| CD4+ cell count, median<br>(cells/ $\mu$ L) |                  |                                   |
| <50                                         | 1                | 1                                 |
| 50-99                                       | 0.94 (0.90-0.98) | 1.02 (0.98-1.07)                  |
| 100-199                                     | 0.93 (0.89-0.96) | 1.10 (1.05-1.14)                  |
| 200-349                                     | 0.98 (0.94-1.03) | 1.34 (1.27-1.40)                  |
| 350-499                                     | 1.01 (0.90-1.14) | 1.51 (1.35-1.70)                  |
| $\geq$ 500                                  | 1.03 (0.88-1.20) | 1.63 (1.38-1.93)                  |
| WHO stage                                   |                  |                                   |
| I & II                                      | 1                | 1                                 |
| III                                         | 0.97 (0.94-1.00) | 0.86 (0.82-0.89)                  |
| IV                                          | 0.95 (0.91-1.00) | 0.76 (0.72-0.81)                  |
| Anaemia                                     |                  |                                   |
| none                                        | 1                | 1                                 |
| mild                                        | 1.08 (1.04-1.12) | 1.14 (1.08-1.20)                  |
| moderate                                    | 1.20 (1.15-1.26) | 1.30 (1.22-1.38)                  |
| severe                                      | 1.27 (1.19-1.35) | 1.47 (1.36-1.59)                  |
| TB at ART start                             | 1.06 (1.01-1.11) | 1.09 (1.01-1.17)                  |
| Cohort                                      |                  |                                   |
| Gugulethu                                   | 1                | 1                                 |
| Hlabisa                                     | 0.26 (0.24-0.27) | 0.24 (0.23-0.25)                  |
| Khayelitsha                                 | 0.33 (0.32-0.35) | 0.32 (0.31-0.34)                  |
| McCord                                      | 1.45 (1.39-1.51) | 0.62 (0.59-0.66)                  |
| Themba Lethu                                | 0.50 (0.48-0.52) | 0.52 (0.50-0.54)                  |
| Tygerberg                                   | 0.25 (0.23-0.27) | 0.24 (0.23-0.26)                  |
